# Supplementary material for: Land Application of Biosolids-Derived Biochar in Australia: A Review
Source: MDPI journal article supplement (doi:10.3390/su151410909), 2023-07-12
Supplement: s1 [file s1]

## **Supporting information**

### **Land application of biosolids-derived biochar in Australia: A review**

Payel Sinha<sup>1</sup>, Serhiy Marchuk<sup>1</sup>, Peter Harris<sup>1</sup>, Diogenes L. Antille<sup>1,2</sup>, Bernadette K. McCabe<sup>1\*</sup>

*<sup>1</sup>University of Southern Queensland, Centre for Agricultural Engineering, Toowoomba, Queensland, Australia*

*<sup>2</sup>CSIRO Agriculture and Food, Canberra, Australian Capital Territory, Australia*

\* Correspondence: [bernadette.mccabe@usq.edu.au](mailto:bernadette.mccabe@usq.edu.au); Tel.: +61-7-4631-1623

**This file includes:**

Table S1

References

**Table S1:** Variation in BDB properties as a function in pyrolysis/gasification temperature. The data were compiled using UC Davis Biochar Database (<http://biochar.ucdavis.edu/>) and data from published peer-reviewed articles from around the world.

| Reference                     | T°C | Yield, % | Total Surface Area m <sup>2</sup> /g | Total Ash Content % | Total C % | Total H % | Total N % | Total P % | pH   | EC dS/m | CEC cmolc/kg | K g/kg | Na g/kg | Ca mg/kg | Mg mg/kg | Al mg/kg | Fe mg/kg |
|-------------------------------|-----|----------|--------------------------------------|---------------------|-----------|-----------|-----------|-----------|------|---------|--------------|--------|---------|----------|----------|----------|----------|
| Méndez et al. (2013) [1]      | 400 |          | 33.4                                 |                     |           |           |           |           | 7.8  | 3.04    | 29.9         |        |         |          |          |          |          |
| Méndez et al. (2013) [1]      | 600 |          | 37.2                                 |                     |           |           |           |           | 8.7  | 1.46    | 11.7         |        |         |          |          |          |          |
| Zhao, L et al. (2013) [2]     | 500 |          | 71.6                                 | 61.9                | 26.6      |           |           | 0.2       | 8.8  |         | 168.0        | 0.5    |         | 6.6      | 0.6      | 1.9      | 2.2      |
| Agrafioti et al. (2013) [3]   | 300 |          | 4.0                                  |                     | 39.7      | 4.1       | 7.1       |           | 6.0  |         |              |        |         |          |          |          |          |
| Agrafioti et al. (2013) [3]   | 500 |          | 18.0                                 |                     | 9.8       | 0.4       | 2.1       |           |      |         |              |        |         |          |          |          |          |
| Liu et al. (2014) [4]         | 450 |          |                                      |                     | 21.3      |           | 3.2       | 1.5       | 8.6  |         |              | 13.8   |         |          |          |          |          |
| Chen et al. (2014) [5]        | 500 |          | 25.4                                 | 74.2                | 17.5      | 0.7       | 1.5       | 1.8       | 8.8  |         | 76.8         | 8.5    | 1.2     | 59.3     | 14.7     | 28.4     | 31.1     |
| Chen et al. (2014) [5]        | 600 |          | 20.3                                 | 77.9                | 18.4      | 0.3       | 1.4       | 1.9       | 9.5  |         | 30.8         | 8.5    | 1.7     | 62.7     | 15.5     | 28.3     | 33.6     |
| Chen et al. (2014) [5]        | 700 |          | 32.2                                 | 81.5                | 16.9      | 0.2       | 1.0       | 2.0       | 11.1 |         | 50.3         | 9.9    | 1.4     | 64.4     | 16.4     | 32.8     | 35.3     |
| Chen et al. (2014) [5]        | 800 |          | 48.5                                 | 83.9                | 16.2      | 0.0       | 0.5       | 1.9       | 12.2 |         | 126.6        | 9.3    | 1.9     | 65.8     | 16.6     | 34.5     | 35.8     |
| Chen et al. (2014) [5]        | 900 |          | 67.6                                 | 88.1                | 15.9      | 0.1       | 0.5       | 2.0       | 12.2 |         | 247.5        | 8.7    | 3.4     | 69.6     | 17.5     | 35.5     | 37.2     |
| Cely et al. (2014) [6]        | 600 |          | 59.2                                 | 73.6                |           |           |           |           | 7.7  | 3.70    | 24.2         |        |         |          |          |          |          |
| Zhao et al. (2014) [7]        | 500 |          | 71.6                                 |                     | 30.6      | 3.3       | 2.9       |           |      |         |              |        |         |          |          |          |          |
| Xu et al. (2014) [8]          | 500 |          | 71.6                                 | 61.4                | 27.7      |           |           |           | 8.9  |         |              | 5.2    |         | 65.7     | 6.5      | 19.3     | 22.1     |
| Oh et al. (2015) [9]          | 400 |          | 19.5                                 |                     | 31.8      | 3.4       | 4.4       |           |      |         |              |        |         |          |          |          |          |
| Song et al. (2014) [9]        | 400 |          | 0.1                                  | 52.0                | 22.6      | 2.7       | 3.5       |           | 7.8  |         |              |        |         |          |          |          |          |
| Song et al. (2014) [9]        | 450 |          | 2.9                                  | 55.6                | 18.6      | 2.0       | 2.4       |           | 8.3  |         |              |        |         |          |          |          |          |
| Song et al. (2014) [9]        | 500 |          | 3.2                                  | 57.6                | 17.7      | 1.7       | 2.3       |           | 9.1  |         |              |        |         |          |          |          |          |
| Song et al. (2014) [9]        | 550 |          | 13.3                                 | 58.5                | 19.6      | 1.8       | 2.1       |           | 10.0 |         |              |        |         |          |          |          |          |
| de la Rosa et al. (2014) [10] | 600 |          | 67.3                                 | 69.5                | 17.9      | 1.5       | 2.0       |           | 6.7  |         |              |        |         |          |          |          |          |
| Pituello et al. (2015) [11]   | 250 |          |                                      | 48.6                | 28.3      |           | 3.8       | 1.7       | 6.9  | 0.69    |              | 4.2    |         |          |          |          |          |
| Pituello et al. (2015) [11]   | 350 |          |                                      | 58.1                | 27.5      |           | 3.6       | 2.0       | 7.3  | 0.09    |              | 4.4    |         |          |          |          |          |
| Pituello et al. (2015) [11]   | 450 |          |                                      | 67.0                | 22.5      |           | 2.8       | 2.2       | 7.2  | 0.13    |              | 4.9    |         |          |          |          |          |
| Pituello et al. (2015) [11]   | 550 |          |                                      | 73.2                | 20.1      |           | 2.3       | 2.4       | 7.1  | 0.21    |              | 4.2    |         |          |          |          |          |
| Chen et al. (2015) [12]       | 900 |          |                                      | 88.1                | 15.9      | 0.1       | 0.5       |           | 10.2 |         | 247.5        |        |         | 69.6     | 17.5     |          |          |
| Ojeda et al. (2015) [13]      | 500 |          |                                      |                     |           |           |           | 5.1       | 10.0 |         |              | 9.1    | 3.8     | 89.1     |          |          | 42.7     |

|                                |     |      |       |      |      |     |     |      |      |      |      |     |     |      |     |      |      |
|--------------------------------|-----|------|-------|------|------|-----|-----|------|------|------|------|-----|-----|------|-----|------|------|
| Leng et al. (2015) [14]        | 280 |      | 12.0  | 68.6 | 18.0 | 1.6 |     |      | 6.2  |      |      |     |     |      |     |      |      |
| Leng et al. (2015) [14]        | 280 |      | 17.0  | 70.2 | 16.5 | 2.2 |     |      | 6.0  |      |      |     |     |      |     |      |      |
| Leng et al. (2015) [14]        | 260 |      | 16.0  | 71.9 | 14.1 | 1.5 |     |      | 6.6  |      |      |     |     |      |     |      |      |
| Liang et al. (2016) [15]       | 300 |      | 6.4   | 20.6 | 63.4 |     | 0.1 |      | 7.5  | 0.31 | 26.0 |     |     |      |     |      |      |
| Liang et al. (2016) [15]       | 500 |      | 174.6 | 22.5 | 76.7 |     | 0.0 |      | 10.3 | 0.95 | 15.2 | 1.9 |     |      |     |      |      |
| van Zveiten et al. (2010) [16] | 550 |      |       |      | 21.0 |     | 0.0 | 5.7  | 7.9  |      |      |     |     |      |     | 11.0 |      |
| Rahman et al. (2021) [17]      | 600 |      |       |      | 9.1  |     | 1.4 | 2.1  | 6.4  | 2.18 |      | 5.6 | 1.0 | 12.4 | 5.6 | 50.2 | 25.8 |
| Netherway et al. (2019) [18]   | 300 | 91.9 | 21.6  | 91.1 | 4.4  | 0.8 | 2.4 | 1.1  | 5.4  |      | 34.5 | 1.3 | 1.9 | 4.5  | 2.9 |      | 43.0 |
| Netherway et al. (2019) [18]   | 400 | 89.8 | 24.6  | 92.7 | 3.1  | 0.7 | 2.0 | 1.1  | 5.2  |      | 38.3 | 1.3 | 2.0 | 5.1  | 3.0 |      | 43.4 |
| Netherway et al. (2019) [18]   | 500 | 87.7 | 25.3  | 93.4 | 2.7  | 0.4 | 1.7 | 1.1  | 5.2  |      | 36.6 | 1.7 | 2.2 | 5.6  | 3.1 |      | 46.7 |
| Hossain et al. (2021) [19]     | 300 | 64.7 | 93.9  |      | 26.7 |     | 3.9 | 5.1  | 7.1  | 0.46 |      | 2.2 |     | 20.4 | 7.2 |      |      |
| Hossain et al. (2010) [20]     | 550 |      |       |      |      |     | 2.3 |      | 8.2  | 1.90 | 35.0 |     |     |      |     |      |      |
| Roberts et al. (2017) [21]     | 300 | 67.5 |       | 58.4 | 24.5 | 2.9 | 4.0 | 6.6  |      |      |      |     |     |      |     |      |      |
| Roberts et al. (2017) [21]     | 450 | 52.5 |       | 73.5 | 19.6 | 1.6 | 3.0 | 8.5  |      |      |      |     |     |      |     |      |      |
| Roberts et al. (2017) [21]     | 600 | 50.2 |       | 80.8 | 19.8 | 1.0 | 2.7 | 9.3  |      |      |      |     |     |      |     |      |      |
| Roberts et al. (2017) [21]     | 750 | 48.1 |       | 79.0 | 19.4 | 0.5 | 2.0 | 10.1 |      |      |      |     |     |      |     |      |      |
| Roberts et al. (2017) [21]     | 300 | 70.1 |       | 48.6 | 32.8 | 3.6 | 5.4 | 7.9  |      |      |      |     |     |      |     |      |      |
| Roberts et al. (2017) [21]     | 450 | 49.1 |       | 68.4 | 25.4 | 1.7 | 3.7 | 11.4 |      |      |      |     |     |      |     |      |      |
| Roberts et al. (2017) [21]     | 600 | 45.5 |       | 76.6 | 24.7 | 1.0 | 3.1 | 12.4 |      |      |      |     |     |      |     |      |      |
| Roberts et al. (2017) [21]     | 750 | 44.4 |       | 80.6 | 24.9 | 0.6 | 2.4 | 11.9 |      |      |      |     |     |      |     |      |      |
| Hossain et al. (2011) [22]     | 300 | 72.3 |       | 52.8 | 25.6 | 2.6 | 3.3 |      | 5.3  | 4.12 |      |     |     |      |     |      |      |
| Hossain et al. (2011) [22]     | 400 | 63.7 |       | 63.3 | 20.2 | 1.3 | 2.4 |      | 4.9  | 4.15 |      |     |     |      |     |      |      |
| Hossain et al. (2011) [22]     | 500 | 57.9 |       | 68.2 | 20.3 | 0.9 | 2.1 |      | 7.3  | 4.70 |      |     |     |      |     |      |      |
| Hossain et al. (2011) [22]     | 700 | 52.4 |       | 72.5 | 20.4 | 0.5 | 1.2 |      | 12.0 | 2.50 |      |     |     |      |     |      |      |
| Wang et al. (2021) [23]        | 350 | 73.3 | 8.0   | 55.1 | 25.3 | 2.2 | 3.2 |      | 7.4  |      |      |     |     |      |     |      |      |
| Wang et al. (2021) [23]        | 450 | 67.1 | 8.8   | 64.4 | 24.3 | 1.7 | 3.0 |      | 8.1  |      |      |     |     |      |     |      |      |
| Wang et al. (2021) [23]        | 550 | 61.3 | 10.2  | 72.4 | 19.9 | 1.1 | 2.4 |      | 8.5  |      |      |     |     |      |     |      |      |
| Frišták et al. (2018) [24]     | 430 |      |       |      | 31.9 | 0.8 |     | 5.7  | 8.6  | 0.35 |      |     |     |      |     |      |      |
| Frišták et al. (2018) [24]     | 430 |      |       |      | 49.9 | 1.5 |     | 1.7  | 8.7  | 0.32 |      |     |     |      |     |      |      |
| Adhikari et al. (2019) [25]    | 400 |      | 4.0   | 48.6 | 50.1 | 2.4 | 4.5 | 2.0  |      |      |      |     |     |      |     |      |      |
| Adhikari et al. (2019) [25]    | 400 |      | 5.0   | 49.5 | 50.6 | 2.4 | 4.4 | 2.2  |      |      |      |     |     |      |     |      |      |
| Adhikari et al. (2019) [25]    | 400 |      | 13.0  | 49.9 | 49.5 | 2.2 | 4.8 | 2.2  |      |      |      |     |     |      |     |      |      |
| Adhikari et al. (2019) [25]    | 400 |      | 17.0  | 49.4 | 49.5 | 1.9 | 4.5 | 2.1  |      |      |      |     |     |      |     |      |      |

|                             |     |  |      |      |      |     |     |      |  |  |  |  |  |  |  |  |  |
|-----------------------------|-----|--|------|------|------|-----|-----|------|--|--|--|--|--|--|--|--|--|
| Adhikari et al. (2019) [25] | 500 |  | 21.0 | 54.7 | 46.7 | 1.4 | 3.9 | 17.0 |  |  |  |  |  |  |  |  |  |
| Adhikari et al. (2019) [25] | 500 |  | 19.0 | 54.2 | 48.5 | 1.4 | 4.0 | 15.5 |  |  |  |  |  |  |  |  |  |
| Adhikari et al. (2019) [25] | 500 |  | 39.0 | 56.3 | 47.0 | 1.2 | 3.9 | 16.5 |  |  |  |  |  |  |  |  |  |
| Adhikari et al. (2019) [25] | 500 |  | 30.0 | 56.5 | 47.1 | 1.2 | 3.9 | 16.1 |  |  |  |  |  |  |  |  |  |
| Adhikari et al. (2019) [25] | 600 |  | 79.5 | 59.1 | 45.5 | 0.9 | 3.4 | 16.1 |  |  |  |  |  |  |  |  |  |
| Adhikari et al. (2019) [25] | 600 |  | 80.5 | 27.7 | 47.1 | 1.0 | 3.5 | 14.2 |  |  |  |  |  |  |  |  |  |
| Adhikari et al. (2019) [25] | 600 |  | 95.0 | 29.1 | 46.3 | 0.9 | 3.3 | 19.8 |  |  |  |  |  |  |  |  |  |
| Adhikari et al. (2019) [25] | 600 |  | 60.5 | 60.8 | 45.4 | 0.9 | 3.3 | 15.3 |  |  |  |  |  |  |  |  |  |

## References

1. Méndez, A.; Terradillos, M.; Gascó, G. Physicochemical and agronomic properties of biochar from sewage sludge pyrolysed at different temperatures. *J Anal Appl Pyrolysis*. **2013**, 102, 124-130. <https://doi.org/10.1016/j.jaap.2013.03.006>.
2. Zhao, L.; Cao, X.; Mašek, O.; Zimmerman, A. Heterogeneity of biochar properties as a function of feedstock sources and production temperatures. *J. Hazard. Mater.* **2013**, 256-257, 1-9. <https://doi.org/10.1016/j.jhazmat.2013.04.015>.
3. Agrafioti, E.; Bouras, G.; Kalderis, D.; Diamadopoulos, E. Biochar production by sewage sludge pyrolysis. *J. Anal. Appl. Pyrolysis* **2013**, 101, 72-78. <https://doi.org/10.1016/j.jaap.2013.02.010>.
4. Liu, T.; Liu, B.; Zhang, W. Nutrients and Heavy Metals in Biochar Produced by Sewage Sludge Pyrolysis: Its Application in Soil Amendment. *Pol. J. Environ.* **2014**, 23, (1), 271-275.
5. Chen, T.; Zhang, Y.; Wang, H.; Lu, W.; Zhou, Z.; Zhang, Y.; Ren, L. Influence of pyrolysis temperature on characteristics and heavy metal adsorptive performance of biochar derived from municipal sewage sludge. *Bioresour. Technol.* **2014**, 164, 47-54. <https://doi.org/10.1016/j.biortech.2014.04.048>.
6. Cely Parra, P.; Tarquis, A.; Paz-Ferreiro, J.; Méndez, A.; Gascó, G. Factors driving carbon mineralization priming effect in a soil amended with different types of biochar. *Solid Earth* **2014**, 6. <https://doi.org/10.5194/sed-6-849-2014>.
7. Zhao, L.; Zheng, W.; Cao, X. Distribution and evolution of organic matter phases during biochar formation and their importance in carbon loss and pore structure. *Chem. Eng. J.* **2014**, 250, 240-247. <https://doi.org/10.1016/j.cej.2014.04.053>.
8. Xu, X.; Cao, X.; Zhao, L.; Sun, T. Comparison of sewage sludge- and pig manure-derived biochars for hydrogen sulfide removal. *Chemosphere* **2014**, 111, 296-303. <https://doi.org/10.1016/j.chemosphere.2014.04.014>.
9. Oh, S.-Y.; Son, J.-G.; Chiu, P.C. Black carbon-mediated reductive transformation of nitro compounds by hydrogen sulfide. *Environ. Earth Sci.* **2015**, 73, (4), 1813-1822. <https://doi.org/10.1007/s12665-014-3535-8>.
10. De la Rosa, J.; Paneque, M.; Miller, A.; Knicker, H. Relating physical and chemical properties of four different biochars and their application rate to biomass production of *Lolium perenne* on a Calcic Cambisol during a pot experiment of 79 days. *Sci. Total Environ.* **2014**, 499C, 175-184. <https://doi.org/10.1016/j.scitotenv.2014.08.025>.
11. Pituello, C.; Francioso, O.; Simonetti, G.; Pisi, A.; Torreggiani, A.; Berti, A.; Morari, F. Characterization of chemical–physical, structural and morphological properties of biochars from biowastes produced at different temperatures. *J. Soils Sediments*. **2015**, 15, (4), 792-804. <https://doi.org/10.1007/s11368-014-0964-7>.
12. Chen, T.; Zhou, Z.; Xu, S.; Wang, H.; Lu, W. Adsorption behavior comparison of trivalent and hexavalent chromium on biochar derived from municipal sludge. *Bioresour. Technol.* **2015**, 190, 388-394. <https://doi.org/10.1016/j.biortech.2015.04.115>.
13. Ojeda, G.; Mattana, S.; Àvila, A.; Alcañiz, J.M.; Volkmann, M.; Bachmann, J. Are soil–water functions affected by biochar application? *Geoderma* **2015**, 249-250, 1-11. <https://doi.org/10.1016/j.geoderma.2015.02.014>.
14. Leng, L.; Yuan, X.-Z.; Huang, H.; Shao, J.; Hou, W.; Chen, X.; Zeng, G. Bio-char derived from sewage sludge by liquefaction: Characterization and application for dye adsorption. *Appl. Surf. Sci.* **2015**, 346, 223-231. <https://doi.org/10.1016/j.apsusc.2015.04.014>.
15. Liang, C.; Gascó, G.; Fu, S.; Méndez, A.; Paz-Ferreiro, J. Biochar from pruning residues as a soil amendment: Effects of pyrolysis temperature and particle size. *Soil Tillage Res.* **2016**, 164, 3-10. <https://doi.org/10.1016/j.still.2015.10.002>.
16. van Zwieten, L.; Kimber, S.; Morris, S.; Downie, A.; Berger, E.; Rust, J.; Scheer, C. Influence of biochars on flux of N<sub>2</sub>O and CO<sub>2</sub> from Ferrosol. *Soil Res.* **2010**, 48, (7), 555-568. <https://doi.org/10.1071/SR10004>.
17. Rahman, M.S.; Schefe, C.; Rajput, S.; Keizer, D.; Weatherley, A. O-aryl and Carbonyl Carbon Contents of Food Waste and Biosolid Predict P Availability in an Acidic Soil. *Front. sustain. food syst.* **2021**, 4, 277.

18. Netherway, P.; Reichman, S.M.; Laidlaw, M.; Scheckel, K.; Pingitore, N.; Gascó, G.; Méndez, A.; Surapaneni, A.; Paz-Ferreiro, J. Phosphorus-Rich Biochars Can Transform Lead in an Urban Contaminated Soil. *J. Environ. Qual.* **2019**, *48*, (4), 1091-1099. <https://doi.org/10.2134/jeq2018.09.0324>.
19. Hossain, M.Z.; Bahar, M.M.; Sarkar, B.; Donne, S.W.; Wade, P.; Bolan, N. Assessment of the fertilizer potential of biochars produced from slow pyrolysis of biosolid and animal manures. *J. Anal. Appl. Pyrolysis* **2021**, *155*, 105043. <https://doi.org/10.1016/j.jaap.2021.105043>.
20. Hossain, M.K.; Strezov, V.; Yin Chan, K.; Nelson, P.F. Agronomic properties of wastewater sludge biochar and bioavailability of metals in production of cherry tomato (*Lycopersicon esculentum*). *Chemosphere* **2010**, *78*, (9), 1167-1171. <https://doi.org/10.1016/j.chemosphere.2010.01.009>.
21. Roberts, D.A.; Cole, A.J.; Whelan, A.; de Nys, R.; Paul, N.A. Slow pyrolysis enhances the recovery and reuse of phosphorus and reduces metal leaching from biosolids. *Waste Manage.* **2017**, *64*, 133-139. <https://doi.org/10.1016/j.wasman.2017.03.012>.
22. Hossain, M.K.; Strezov, V.; Chan, K.Y.; Ziolkowski, A.; Nelson, P.F. Influence of pyrolysis temperature on production and nutrient properties of wastewater sludge biochar. *J. Environ. Manage.* **2011**, *92*, (1), 223-228. <https://doi.org/10.1016/j.jenvman.2010.09.008>.
23. Wang, Z.; Liu, S.; Liu, K.; Ji, S.; Wang, M.; Shu, X. Effect of temperature on pyrolysis of sewage sludge: Biochar properties and environmental risks from heavy metals. *E3S Web Conf.* **2021**, 237.
24. Frišták, V.; Pipiška, M.; Soja, G. Pyrolysis treatment of sewage sludge: A promising way to produce phosphorus fertilizer. *J. Clean. Prod.* **2017**, 172. <https://doi.org/10.1016/j.jclepro.2017.12.015>.
25. Adhikari, S.; Gascó, G.; Méndez, A.; Surapaneni, A.; Jegatheesan, V.; Shah, K.; Paz-Ferreiro, J. Influence of pyrolysis parameters on phosphorus fractions of biosolids derived biochar. *Sci. Total Environ.* **2019**, *695*, 133846. <https://doi.org/10.1016/j.scitotenv.2019.133846>.
